# Supplementary material for: Expression of connexin-43 in surgical resections of primary tumor and lymph node metastases of squamous cell carcinoma and adenocarcinoma of the lung: a retrospective study
Source: PeerJ. 2022 Mar 9;10:e13055. doi: 10.7717/peerj.13055 (PMC8917803; doi:10.7717/peerj.13055)
Supplement: Supplemental Information 1 [file peerj-10-13055-s001.xls]

## Sheet: dataset
Year	Tumor type	Sex	Age [years]	Cx43 expression in primary tumor			STAS		Presence of lymphatic metastasis	Cx43 expression in lymphatic metastasis
				Distribution	Intensity	Localization	Presence of STAS	Cx43 expression in STAS		Distribution	Intensity	Localization
2016	AC	female	47	1	1	cytoplasm	yes	yes	yes	1	2	cytoplasm
2016	AC	female	70	0	2	cytoplasm	no		yes	0	0
2016	AC	female	72	1	2	cytoplasm	no		yes	1	2	cytoplasm
2016	AC	female	64	1	2	nucleus and cytoplasm	yes	no	no
2016	AC	female	51	2	3	cytoplasm			no
2016	AC	male	74	2	3	cytoplasm	yes	yes	yes	2	3	membrane and cytoplasm
2016	AC	female	64	0	0		no		yes	0	0
2016	AC	female	69	1	1	cytoplasm	no		no
2016	AC	male	69	1	2	cytoplasm	no		yes	0	0
2016	AC	female	57	0	0		yes	no	no
2016	AC	male	64	0	0				no
2015	AC	female	65	0	0		yes	yes	no
2015	AC	female	63	0	0		no		yes	0	0
2015	AC	male	51	1	1	cytoplasm	yes	yes	no
2015	AC	male	48	0	0				no
2015	AC	female	62	1	1	cytoplasm	yes	no	no
2015	AC	female	58	1	2	cytoplasm	no		yes	0	0
2015	AC	female	55	0	0		no		yes	0	0
2015	AC	male	67	1	1	nucleus and cytoplasm	yes	no	yes	2	2	cytoplasm
2015	AC	female	67	0	0		yes	no	no
2015	AC	male	62	0	0		no		no
2015	AC	male	67	0	0		no		no
2015	AC	male	59	0	0		no		no
2014	AC	male	65	1	2	cytoplasm			yes	1	3	cytoplasm
2014	AC	female	55	0	0		no		yes	0	0
2014	AC	female	57	1	2	cytoplasm			no
2014	AC	male	64	2	3	membrane and cytoplasm	yes	yes	yes	1	2	cytoplasm
2014	AC	female	63	0	0		yes	no	yes	0	0
2014	AC	male	66	0	1	cytoplasm	no		no
2014	AC	female	57	0	0	nucleus	yes	no	yes	0	0
2014	AC	male	64	0	0		no		no
2014	AC	female	67	0	0		no		no
2014	AC	male	68	0	2	cytoplasm	yes	no	yes	0	0
2014	AC	male	75	2	2	cytoplasm	no		no
2014	AC	female	60	0	0		no	no	no
2014	AC	male	66	0	0		yes	no	yes	0	0
2014	AC	male	47	0	1	cytoplasm	yes	yes	yes	0	1	cytoplasm
2014	AC	female	61	0	0		no		no
2014	AC	female	61	1	2	cytoplasm	no		yes	0	0
2013	AC	male	52	0	0				yes	1	1	cytoplasm
2013	AC	female	70	0	0		no		no
2013	AC	female	47	2	2	cytoplasm	no		yes	1	1	cytoplasm
2013	AC	male	60	1	1	cytoplasm			no
2013	AC	female	61	1	3	cytoplasm	no		yes	2	3	cytoplasm
2012	AC	female	77	2	3	cytoplasm	no		no
2012	AC	female	43	0	1	cytoplasm	yes	no	no
2012	AC	female	76	1	3	nucleus and cytoplasm			no
2012	AC	female	62	2	1	cytoplasm	no		yes	2	3	nucleus
2012	AC	female	58	0	0		no		yes	0	0
2012	AC	female	54	2	2	cytoplasm	yes	yes	yes	2	3	cytoplasm
2012	AC	male	70	2	1	cytoplasm	yes	yes	no
2012	AC	male	59	0	0				no
2016	SqCC	male	68	2	2	membrane and cytoplasm			no
2016	SqCC	female	60	2	3	membrane and cytoplasm	yes	yes	yes	2	3	cytoplasm
2016	SqCC	male	64	2	3	cytoplasm	no		no
2016	SqCC	male	66	1	3	cytoplasm			no
2016	SqCC	male	64	2	2	membrane and cytoplasm	no		no
2016	SqCC	male	57	2	3	membrane and cytoplasm	no		yes	2	2	cytoplasm
2016	SqCC	female	54	2	3	membrane and cytoplasm	yes	yes	no
2015	SqCC	male	59	2	3	cytoplasm	no		no
2015	SqCC	male	60	2	3	membrane and cytoplasm	no		no
2015	SqCC	male	52	1	2	cytoplasm			no
2015	SqCC	female	72	2	3	membrane and cytoplasm	yes	yes	yes	2	3	membrane and cytoplasm
2015	SqCC	male	63	2	3	membrane and cytoplasm	no		no
2015	SqCC	female	54	2	3	cytoplasm	no		no
2015	SqCC	male	58	0	0		no		yes	0	0
2015	SqCC	male	64	1	2	cytoplasm	no		yes	1	2	cytoplasm
2015	SqCC	female	55	2	2	cytoplasm	yes	yes	no
2015	SqCC	female	59	2	2	cytoplasm			no
2015	SqCC	male	68	2	3	cytoplasm	yes	no	no
2014	SqCC	male	54	1	2	cytoplasm			yes	1	2	cytoplasm
2014	SqCC	female	71	2	3	cytoplasm	no		yes	2	3	membrane and cytoplasm
2014	SqCC	female	59	2	2	cytoplasm	no		no
2014	SqCC	male	61	2	2	membrane and cytoplasm	no		no
2014	SqCC	male	60	1	2	membrane and cytoplasm			no
2014	SqCC	female	68	2	3	membrane and cytoplasm			no
2014	SqCC	male	65	2	3	membrane and cytoplasm			yes	2	3	membrane and cytoplasm
2014	SqCC	male	62	1	1	membrane and cytoplasm	no		no
2014	SqCC	female	71	0	0		yes	no	no
2013	SqCC	male	58	2	3	membrane and cytoplasm	yes	yes	yes	2	3	membrane and cytoplasm
2013	SqCC	female	47	1	2	cytoplasm	yes	no	no
2013	SqCC	female	65	2	3	membrane and cytoplasm	yes	yes	yes	2	3	membrane and cytoplasm
2013	SqCC	male	71	1	3	membrane and cytoplasm	no		yes	2	3	cytoplasm
2012	SqCC	male	79	2	3	membrane and cytoplasm			no
2012	SqCC	male	54	2	3	membrane and cytoplasm			no
2012	SqCC	male	62	1	2	cytoplasm	yes	no	no
2012	SqCC	male	63	2	3	membrane and cytoplasm			yes	2	3	cytoplasm
2012	SqCC	male	70	2	3	cytoplasm	yes	yes	yes	2	3	membrane and cytoplasm
